# Supplementary material for: Fabrication of inverse opal photonic gel sensors on flexible substrates by transfer process
Source: Royal Society of Chemistry journal article supplement (doi:10.1039/d1lc00199j), 2021-01-01
Supplement: d1lc00199j1.pdf [file d1lc00199j1.pdf]

## Supplementary Informations

### **Fabrication of Inverse Opal Photonic Gel Sensors on Flexible Substrate by Transfer Process**

Sohee Yoon<sup>1</sup>, Habin Park<sup>1,2</sup>, Wonmok Lee<sup>1,2</sup>

---

<sup>1</sup>Department of Chemistry, Sejong University, 209, Neungdong-ro, Gwangjin-gu, Seoul 05006, Republic of Korea

<sup>2</sup>ENGAIN Co. Ltd., 700, Daewangpangyo-ro, Bundang-gu, Seongnam-si, Gyeonggi-do 13488, Republic of Korea

**(a)**

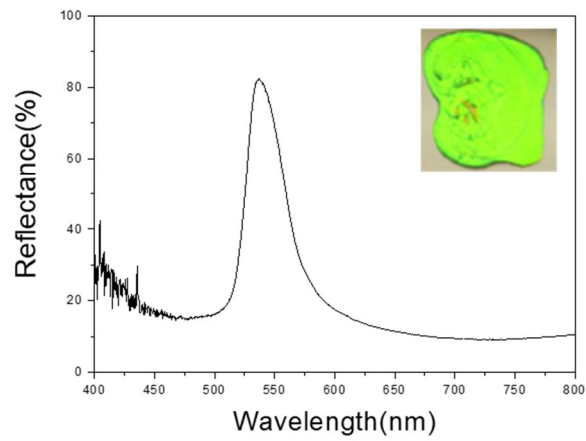

**(b)**

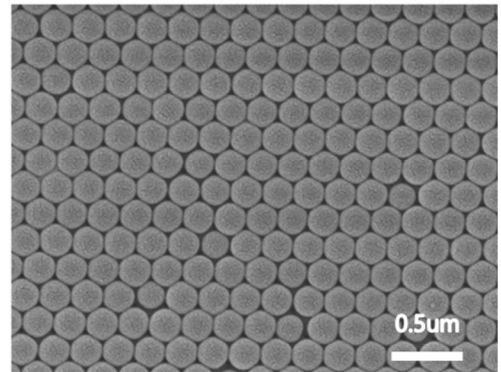

**Fig S1.** (a) Reflectance spectrum of the 230 nm PS  $\mu$ -sphere used in this study. Inset photography in reflectance spectrum is a drop-cast opal film from the PS  $\mu$ -sphere.(b) SEM image of the drop-cast film.

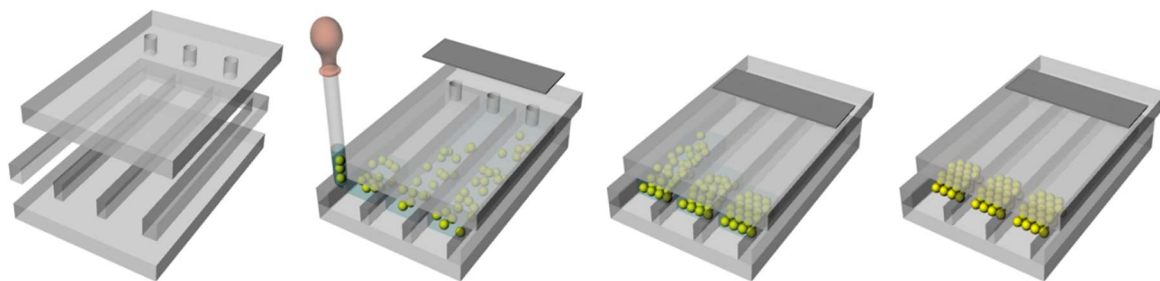

**Fig S2.** Fabrication procedures for opal template by DEECA. First, Surlyn spacer is sandwiched between a C18-glass with holes and a C-6 glass which were used as top and bottom substrates respectively, and hot-pressed at 70°C. After an aqueous dispersion of PS  $\mu$ -sphere is filled in the channels by capillary force, top holes are taped. Upon water evaporation, self-assembled opal films are formed at the wide open inlet, and the dried opal film is further annealed at 90°C for 3h.

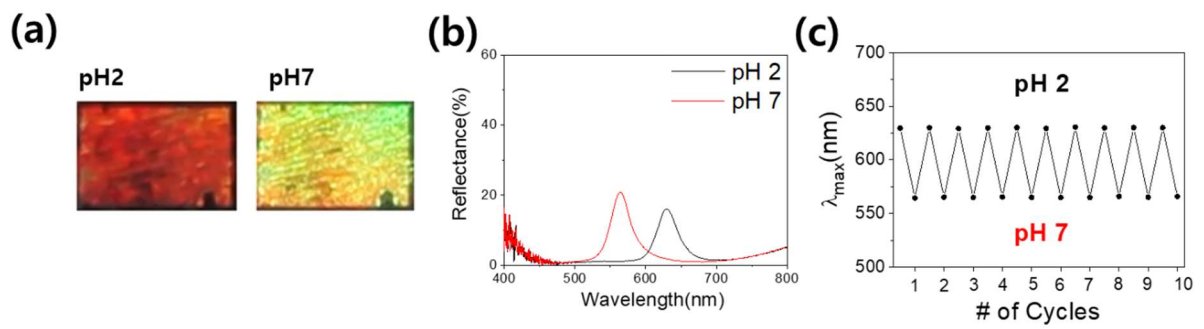

**Fig S3.** (a) VI-containing IOPG on glass substrate immersed in the phosphate buffers respectively adjusted at pH 2 and pH 7, (b) corresponding reflectance spectra of VI-IOPG at each pH, (c) plot of  $\lambda_{\text{peak}}$  of VI-IOPG on glass under repeated pH changes between pH 2 and 7.

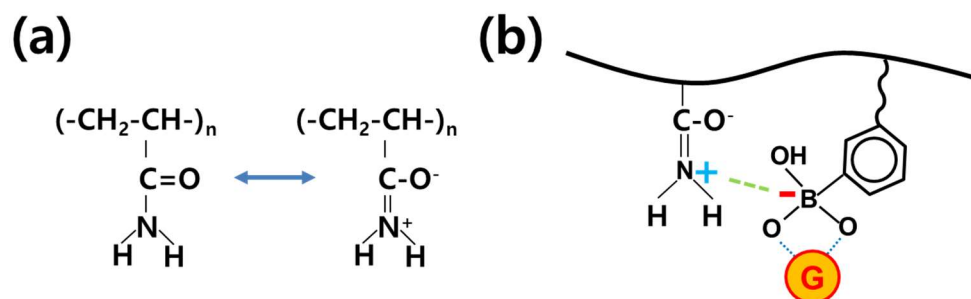

**Fig S4.** (a) Resonance structures of polyacrylamide, (b) the charge stabilisation of glucose-bound phenylboronic acid anion within the IOPG with adjacent cationic nitrogen in acrylamide.

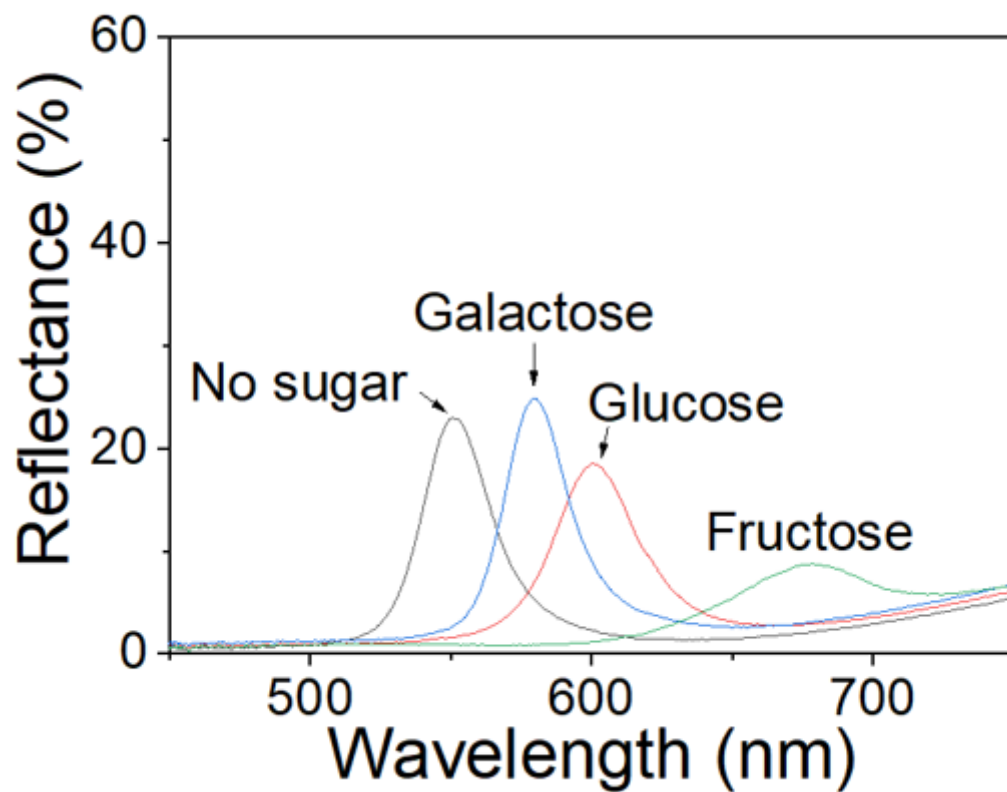

**Fig S5.** Reflectance spectra of an 3AAPBA-AAm-IOPG immersed in three aqueous phosphate buffer solutions respectively containing different monosaccharides at 10mM concentrations. pH for each solution was adjusted at 7.4.
